# Supplementary material for: Changes in the Frequency and Type of Barriers to Reproductive Health Care Between 2017 and 2021
Source: PubMed Central journal article supplement (PMC10087056; doi:10.1001/jamanetworkopen.2023.7461), 2023-04-10
Supplement: jamanetwopen-e237461-s001.pdf [file jamanetwopen-e237461-s001.pdf]

## Supplemental Online Content

Adler A, Biggs MA, Kaller S, Schroeder R, Ralph L. Changes in the frequency and type of barriers to reproductive health care between 2017 and 2021. *JAMA Netw Open*. 2023;6(4):e237461. doi:10.1001/jamanetworkopen.2023.7461

**eTable.** Sociodemographic Profiles of the National Survey of Family Growth, 2017 to 2019, and the Ipsos KnowledgePanel Populations, 2017 and 2021

This supplemental material has been provided by the authors to give readers additional information about their work.

**eTable.** Sociodemographic Profiles of the National Survey of Family Growth, 2017 to 2019, and the Ipsos KnowledgePanel Populations, 2017 and 2021

|                                                     |                                    | National Survey of Family Growth, 2017-19 (N=5557) | Ipsos Sample, 2017 (N=7022) | Ipsos Sample, 2021 (N = 6841) |
|-----------------------------------------------------|------------------------------------|----------------------------------------------------|-----------------------------|-------------------------------|
|                                                     |                                    | Weighted %                                         | Weighted %                  | Weighted %                    |
| <b>Percent of Federal Poverty Level<sup>^</sup></b> |                                    |                                                    |                             |                               |
|                                                     | <100%                              | 21.2                                               | 15.2                        | 11.1                          |
|                                                     | 100 to 199%                        | 22.6                                               | 16.0                        | 13.6                          |
|                                                     | ≥ 200%                             | 56.2                                               | 68.8                        | 72.3                          |
|                                                     | Missing                            | --                                                 | --                          | 3.3                           |
| <b>Age (years)</b>                                  |                                    |                                                    |                             |                               |
|                                                     | 18-19                              | 5.8                                                | 4.6                         | 2.8                           |
|                                                     | 20-24                              | 14.8                                               | 14.8                        | 14.4                          |
|                                                     | 25-29                              | 17.1                                               | 16.8                        | 17.1                          |
|                                                     | 30-34                              | 16.2                                               | 16.5                        | 17.6                          |
|                                                     | 35-39                              | 16.0                                               | 15.8                        | 16.8                          |
|                                                     | 40-44                              | 14.5                                               | 15.2                        | 15.9                          |
|                                                     | 45-49                              | 15.7                                               | 16.2                        | 15.3                          |
| <b>Race/ethnicity</b>                               |                                    |                                                    |                             |                               |
|                                                     | Non-Hispanic white                 | 57.9                                               | 57.1                        | 55.1                          |
|                                                     | Non-Hispanic Black                 | 14.7                                               | 13.1                        | 13.9                          |
|                                                     | Non-Hispanic other                 | 7.0                                                | 9.5                         | 10.0                          |
|                                                     | Hispanic                           | 20.5                                               | 20.3                        | 20.9                          |
| <b>Language of the survey</b>                       |                                    |                                                    |                             |                               |
|                                                     | English                            | 89.9                                               | 91.1                        | 93.1                          |
|                                                     | Spanish                            | 8.0                                                | 8.9                         | 6.9                           |
|                                                     | Other <sup>a</sup>                 | 2.2                                                | --                          | --                            |
| <b>Highest level of education completed</b>         |                                    |                                                    |                             |                               |
|                                                     | < High school (HS)                 | 8.7                                                | 10.0                        | 8.2                           |
|                                                     | HS diploma or GED                  | 25.4                                               | 22.8                        | 21.6                          |
|                                                     | Some college or associate's degree | 22.5                                               | 32.0                        | 29.3                          |
|                                                     | College degree                     | 43.5                                               | 35.2                        | 40.9                          |
| <b>Ever been pregnant</b>                           |                                    |                                                    |                             |                               |
|                                                     | Yes                                | 65.8                                               | n/a <sup>&amp;</sup>        | 57.9                          |
|                                                     | No                                 | 34.2                                               | n/a                         | 41.5                          |
|                                                     | Refused                            | --                                                 | n/a                         | 0.6                           |

<sup>^</sup> NSFG notes that they conduct multiple imputation on those missing household income; we do not perform multiple imputation and present a separate missing category. <sup>&</sup> Not asked in 2017 survey.
