# Supplementary material for: Changes in the Frequency and Type of Barriers to Reproductive Health Care Between 2017 and 2021
Source: PubMed Central journal article supplement (PMC10087056; doi:10.1001/jamanetworkopen.2023.7461), 2023-04-10
Supplement: jamanetwopen-e237461-s002.pdf [file jamanetwopen-e237461-s002.pdf]

## Data Sharing Statement

Adler. Changes in the Frequency and Type of Barriers to Reproductive Health Care Between 2017 and 2021. *JAMA Netw Open*. Published April 10, 2023.

doi:10.1001/jamanetworkopen.2023.7461

### Data

**Data available:** No

### Additional Information

**Explanation for why data not available:** Given ethical approvals obtained, data will not be posted in a public repository. However, data can be made available upon reasonable request to the corresponding author.
